# Supplementary material for: Higher parental occupational social contact is associated with a reduced risk of incident pediatric type 1 diabetes: Mediation through molecular enteroviral indices
Source: PubMed Central journal article supplement (PMC5903611; doi:10.1371/journal.pone.0193992), 2018-04-17
Supplement: pone.0193992.s001.pdf [file pone.0193992.s001.pdf]

**S1 Table. Parental occupational social contact questions with mutually exclusive responses**

|                                                                                     | <b>Mother (or other)</b>                                                                                                                                                                                                                                                                                                                   | <b>Father (or other)</b>                                                                                                                                                                                                                                                                                                                   |
|-------------------------------------------------------------------------------------|--------------------------------------------------------------------------------------------------------------------------------------------------------------------------------------------------------------------------------------------------------------------------------------------------------------------------------------------|--------------------------------------------------------------------------------------------------------------------------------------------------------------------------------------------------------------------------------------------------------------------------------------------------------------------------------------------|
| How many adults do you come into contact with on a usual weekday between 9am-5pm?   | <input type="checkbox"/> No adults<br><input type="checkbox"/> <10 well adults<br><input type="checkbox"/> 10<30 well adults<br><input type="checkbox"/> 30 or more well adults<br><br>and<br><input type="checkbox"/> No sick adults<br><input type="checkbox"/> 1 or more sick adults                                                    | <input type="checkbox"/> No adults<br><input type="checkbox"/> <10 well adults<br><input type="checkbox"/> 10<30 well adults<br><input type="checkbox"/> 30 or more well adults<br><br>and<br><input type="checkbox"/> No sick adults<br><input type="checkbox"/> 1 or more sick adults                                                    |
| How many children do you come into contact with on a usual weekday between 9am-5pm? | <input type="checkbox"/> No children under age 16<br><input type="checkbox"/> <10 well children under age 16<br><input type="checkbox"/> 10<30 well children under age 16<br><input type="checkbox"/> 30 or more well children<br><br>and<br><input type="checkbox"/> No sick children<br><input type="checkbox"/> 1 or more sick children | <input type="checkbox"/> No children under age 16<br><input type="checkbox"/> <10 well children under age 16<br><input type="checkbox"/> 10<30 well children under age 16<br><input type="checkbox"/> 30 or more well children<br><br>and<br><input type="checkbox"/> No sick children<br><input type="checkbox"/> 1 or more sick children |
| How many animals do you come into contact with on a usual weekday between 9am-5pm?  | <input type="checkbox"/> No animals<br><input type="checkbox"/> <10 well animals a day<br><input type="checkbox"/> 10<30 well animals a day<br><input type="checkbox"/> 30 or more animals a day<br><br>and<br><input type="checkbox"/> No sick animals<br><input type="checkbox"/> 1 or more sick animals                                 | <input type="checkbox"/> No animals<br><input type="checkbox"/> <10 well animals a day<br><input type="checkbox"/> 10<30 well animals a day<br><input type="checkbox"/> 30 or more animals a day<br><br>and<br><input type="checkbox"/> No sick animals<br><input type="checkbox"/> 1 or more sick animals                                 |
